# Supplementary material for: Mixed myeloid chimerism and relapse of myelofibrosis after allogeneic stem cell transplantation
Source: PubMed Central journal article supplement — Haematologica. 2019 Jul 11;106(7):1988–90. doi: 10.3324/haematol.2019.223503 (PMC8252931; doi:10.3324/haematol.2019.223503), 2019-07-11
Supplement: 2019_223503_SROUR_SUPPL.pdf [file 2019_223503_SROUR_SUPPL.pdf]

**Mixed myeloid chimerism and relapse of myelofibrosis after allogeneic stem cell transplantation**

---

Samer A. Srouf,<sup>1</sup> Amanda Olson,<sup>1</sup> Stefan O. Ciurear,<sup>1</sup> Parth Desair,<sup>2</sup> Qaiser Bashir,<sup>1</sup> Betul Oran,<sup>1</sup> Prithviraj Boser,<sup>3</sup> Rohtesh Mehtar,<sup>1</sup> Keyur P. Patel,<sup>3</sup> Naveen Pemmarajur,<sup>3</sup> Naval Daverr,<sup>3</sup> Srdan Verstovsek,<sup>3</sup> Richard E. Champlin<sup>1</sup> and Uday R. Popat<sup>1</sup>

<sup>1</sup>Department of Stem Cell Transplantation and Cellular Therapy, The University of Texas MD Anderson Cancer Center, Houston; <sup>2</sup>Department of Medicine, The University of Texas Health Science Center at San Antonio, San Antonio; <sup>3</sup>Department of Leukemia, The University of Texas MD Anderson Cancer Center, Houston and <sup>4</sup>Department of Hematopathology, The University of Texas MD Anderson Cancer Center, Houston, TX, USA

Correspondence: UDAY R. POPAT - [upopat@mdanderson.org](mailto:upopat@mdanderson.org)

doi:10.3324/haematol.2019.223503

**Supplemental figure legends****Supplemental Figure 1. Flow chart of MF patient cohorts and frequency of relapse**

**according to myeloid chimerism status.** \*These two patients underwent immunosuppression reduction before any evidence of relapse. One was converted to full donor chimerism, and the other had progressive loss of donor myeloid chimerism and graft failure. \*\*This patient with mixed T-cell chimerism had a molecular relapse (recurrent JAK2 mutation) that responded to a tacrolimus dose reduction (converted to full donor chimerism and had molecular remission).

**Supplementary Figure 2. Flow chart for outcomes and interventions done for MF patients with mixed myeloid chimerism.**

**Supplemental Figure 3. Kaplan-Meier estimates for progression-free survival (A) and overall survival (B) of the study patients by mixed myeloid chimerism status.**

Supplementary table 1. Individual patient characteristics and outcomes for the mixed myeloid chimerism patients

| No. | Age in years | Gender | Molecular status prior to transplant* | Progression** | Immunosuppression reduction | Response to immunosuppression reduction | GVHD | Subsequent Treatment                                                               | Final response | Follow-up in days | Status at last follow-up | Cause of death    |
|-----|--------------|--------|---------------------------------------|---------------|-----------------------------|-----------------------------------------|------|------------------------------------------------------------------------------------|----------------|-------------------|--------------------------|-------------------|
| 1.  | 54           | F      | Positive                              | Yes           | Yes                         | Yes                                     | Yes  | None                                                                               | CR             | 3005              | Alive                    | NA                |
| 2.  | 53           | F      | Positive                              | Yes           | Yes                         | No                                      | No   | Second allo-SCT                                                                    | CR             | 3071              | Alive                    | NA                |
| 3.  | 27           | M      | Negative                              | Yes           | Yes                         | No                                      | No   | Second allo-SCT                                                                    | CR             | 2563              | Alive                    | NA                |
| 4.  | 54           | F      | Positive                              | Yes           | Yes                         | No                                      | No   | Second allo-SCT                                                                    | CR             | 2103              | Alive                    | NA                |
| 5.  | 70           | F      | Negative                              | Yes           | Yes                         | Yes                                     | Yes  | None                                                                               | CR             | 1480              | Alive                    | NA                |
| 6.  | 45           | F      | Positive                              | Yes           | Yes                         | No                                      | No   | Second allo-SCT                                                                    | CR             | 1420              | Alive                    | NA                |
| 7.  | 65           | F      | Negative                              | No            | Yes                         | Yes                                     | Yes  | None                                                                               | CR             | 1040              | Alive                    | NA                |
| 8.  | 55           | M      | Negative                              | Yes           | Yes                         | Yes                                     | Yes  | None                                                                               | CR             | 742               | Alive                    | NA                |
| 9.  | 41           | M      | Positive                              | Yes           | Yes                         | Yes                                     | Yes  | None                                                                               | CR             | 824               | Alive                    | NA                |
| 10. | 56           | F      | Positive                              | Yes           | Yes                         | Yes                                     | Yes  | None                                                                               | CR             | 2267              | Alive                    | NA                |
| 11. | 60           | M      | Positive                              | Yes           | Yes                         | Yes                                     | Yes  | None                                                                               | CR             | 1950              | Alive                    | NA                |
| 12. | 55           | M      | Positive                              | No            | Yes                         | Yes                                     | Yes  | None                                                                               | CR             | 1684              | Alive                    | NA                |
| 13. | 60           | M      | Negative                              | Yes, AML      | Yes                         | No                                      | No   | Second allo-SCT                                                                    | CR             | 3028              | Alive                    | NA                |
| 14. | 60           | M      | Negative                              | Yes           | Yes                         | No                                      | No   | Stem cell boost with no response, second allo-SCT                                  | CR             | 2758              | Alive                    | NA                |
| 15. | 67           | F      | Positive                              | Yes           | Yes                         | Yes                                     | Yes  | None                                                                               | CR             | 726               | Alive                    | NA                |
| 16. | 52           | F      | Positive                              | Yes           | Yes                         | NE                                      | NE   | NA                                                                                 | NE             | 98                | Alive                    | NA                |
| 17. | 61           | F      | Positive                              | Yes           | Yes                         | No                                      | Yes  | Second allo-SCT                                                                    | CR             | 1680              | Alive                    | NA                |
| 18. | 59           | F      | Positive                              | Yes, AML      | Yes                         | No                                      | No   | Induction with idarubicin and cytarabine, followed by second allo-SCT              | NR             | 259               | Dead                     | AML               |
| 19. | 63           | F      | Positive                              | Yes           | Yes                         | No                                      | No   | Hydroxyurea, followed by splenectomy                                               | NR             | 1089              | Dead                     | Progression       |
| 20. | 63           | M      | Negative                              | Yes           | Yes                         | Yes                                     | Yes  | None                                                                               | CR             | 103               | Dead                     | GVHD              |
| 21. | 70           | M      | Positive                              | Yes           | Yes                         | Yes                                     | Yes  | None                                                                               | CR             | 1030              | Dead                     | GVHD              |
| 22. | 59           | M      | Positive                              | Yes           | Yes                         | No                                      | No   | DLI                                                                                | NR             | 385               | Dead                     | Progression       |
| 23. | 62           | M      | Negative                              | Yes†          | Yes                         | No                                      | Yes  | Decitabine                                                                         | NR             | 211               | Dead                     | Progression       |
| 24. | 62           | F      | Positive                              | Yes           | Yes                         | No                                      | Yes  | None                                                                               | NR             | 121               | Dead                     | GVHD, progression |
| 25. | 59           | M      | Positive                              | Yes, AML      | Yes                         | No                                      | Yes  | Decitabine                                                                         | NR             | 247               | Dead                     | AML               |
| 26. | 74           | F      | Negative                              | Yes           | Yes                         | No                                      | No   | Decitabine, followed by investigational therapies                                  | NR             | 625               | Dead                     | Progression       |
| 27. | 54           | M      | Negative                              | Yes           | NA#                         | NA                                      | NA   | Second allo-SCT                                                                    | CR             | 2472              | Dead                     | Second malignancy |
| 28. | 59           | M      | Negative                              | Yes, AML      | Yes                         | No                                      | No   | Hydrea                                                                             | NR             | 206               | Dead                     | AML               |
| 29. | 58           | F      | Positive                              | Yes           | Yes                         | No                                      | Yes  | Lenalidomide                                                                       | NR             | 982               | Dead                     | Progression       |
| 30. | 51           | F      | Negative                              | Yes, AML      | Yes                         | No                                      | No   | Induction with idarubicin and cytarabine, followed by re-induction with decitabine | NR             | 261               | Dead                     | AML               |
| 31. | 46           | M      | Positive                              | Yes           | NA#                         | NA                                      | NA   | DLI                                                                                | CR             | 1210              | Dead                     | Second malignancy |
| 32. | 51           | F      | Positive                              | Yes, AML      | NA#                         | NA                                      | NA   | Induction with cladribine, idarubicin, and cytarabine (CIA)                        | NR             | 1348              | Dead                     | AML               |
| 33. | 63           | M      | Positive                              | Yes, AML      | Yes                         | No                                      | No   | Induction with Fludarabine and Cytarabine                                          | NR             | 344               | Dead                     | AML               |
| 34. | 58           | M      | Negative                              | Yes, AML      | Yes                         | No                                      | No   | None                                                                               | NR             | 341               | Dead                     | AML               |
| 35. | 54           | M      | Negative                              | Yes           | No                          | NA                                      | NA   | None                                                                               | NR             | 117               | Dead                     | Progression       |

Abbreviations: allo-SCT, allogeneic stem cell transplantation; AML, acute myeloid leukemia; CR, complete remission; DLI, donor lymphocyte infusion; F, female; GVHD, graft-versus-host disease; M, male; MF, myelofibrosis; NA, not applicable; NE, not evaluable; NR, no response

\*All patients had positive JAK2 mutation except for one patient with MPL mutation

\*\*All patients with molecular relapse had morphological bone marrow features of residual/progressive myelofibrosis, except for patient No. 31

†Patient progressed with bone marrow blasts of 19%, accelerated phase myelofibrosis

#Patients were off immunosuppression on the date they found to have mixed myeloid chimerism

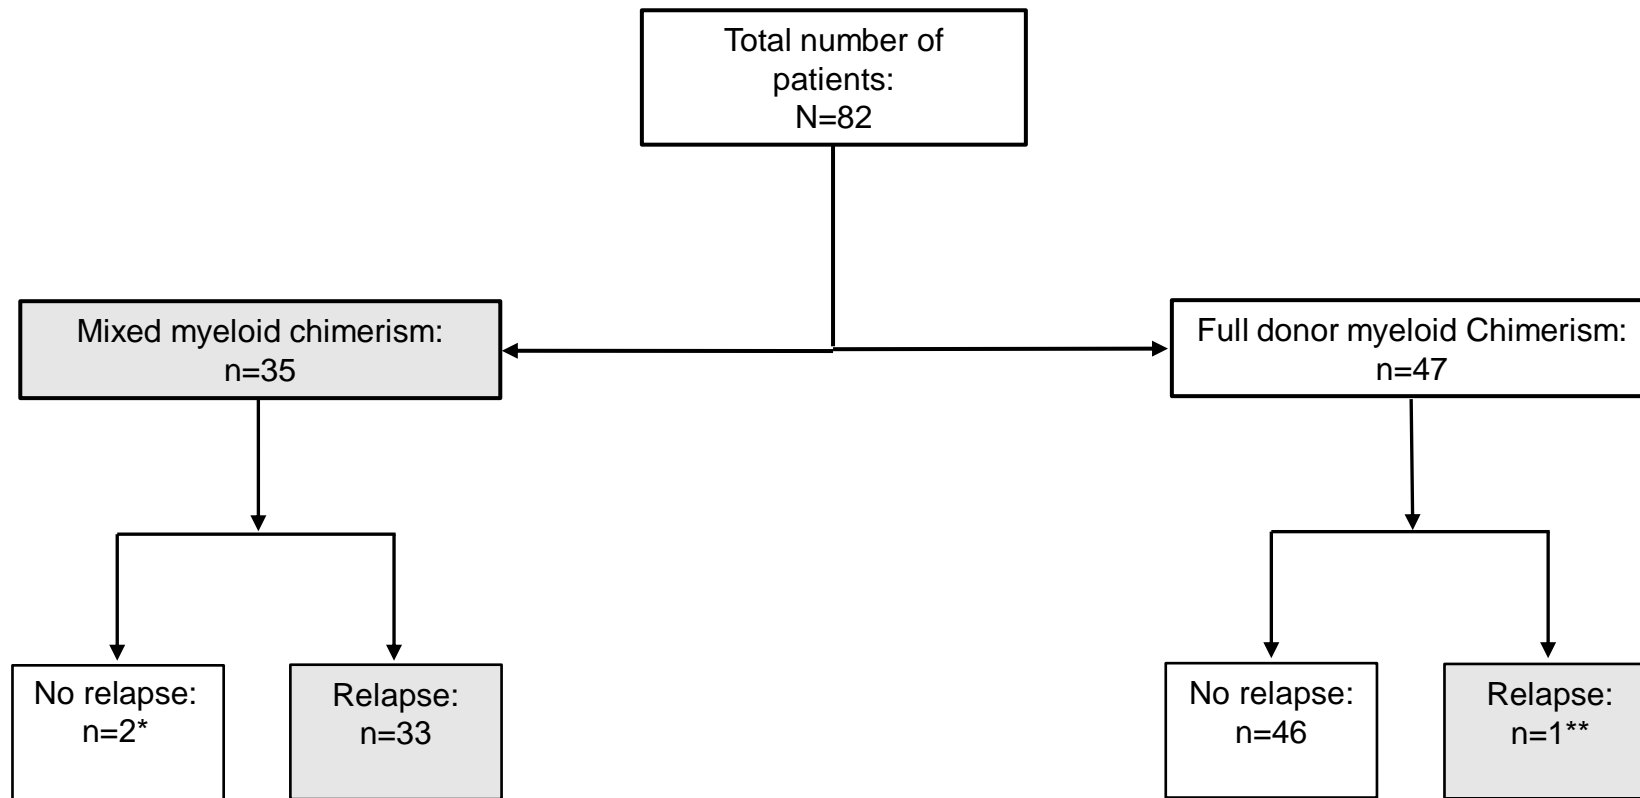

Supplementary figure 1

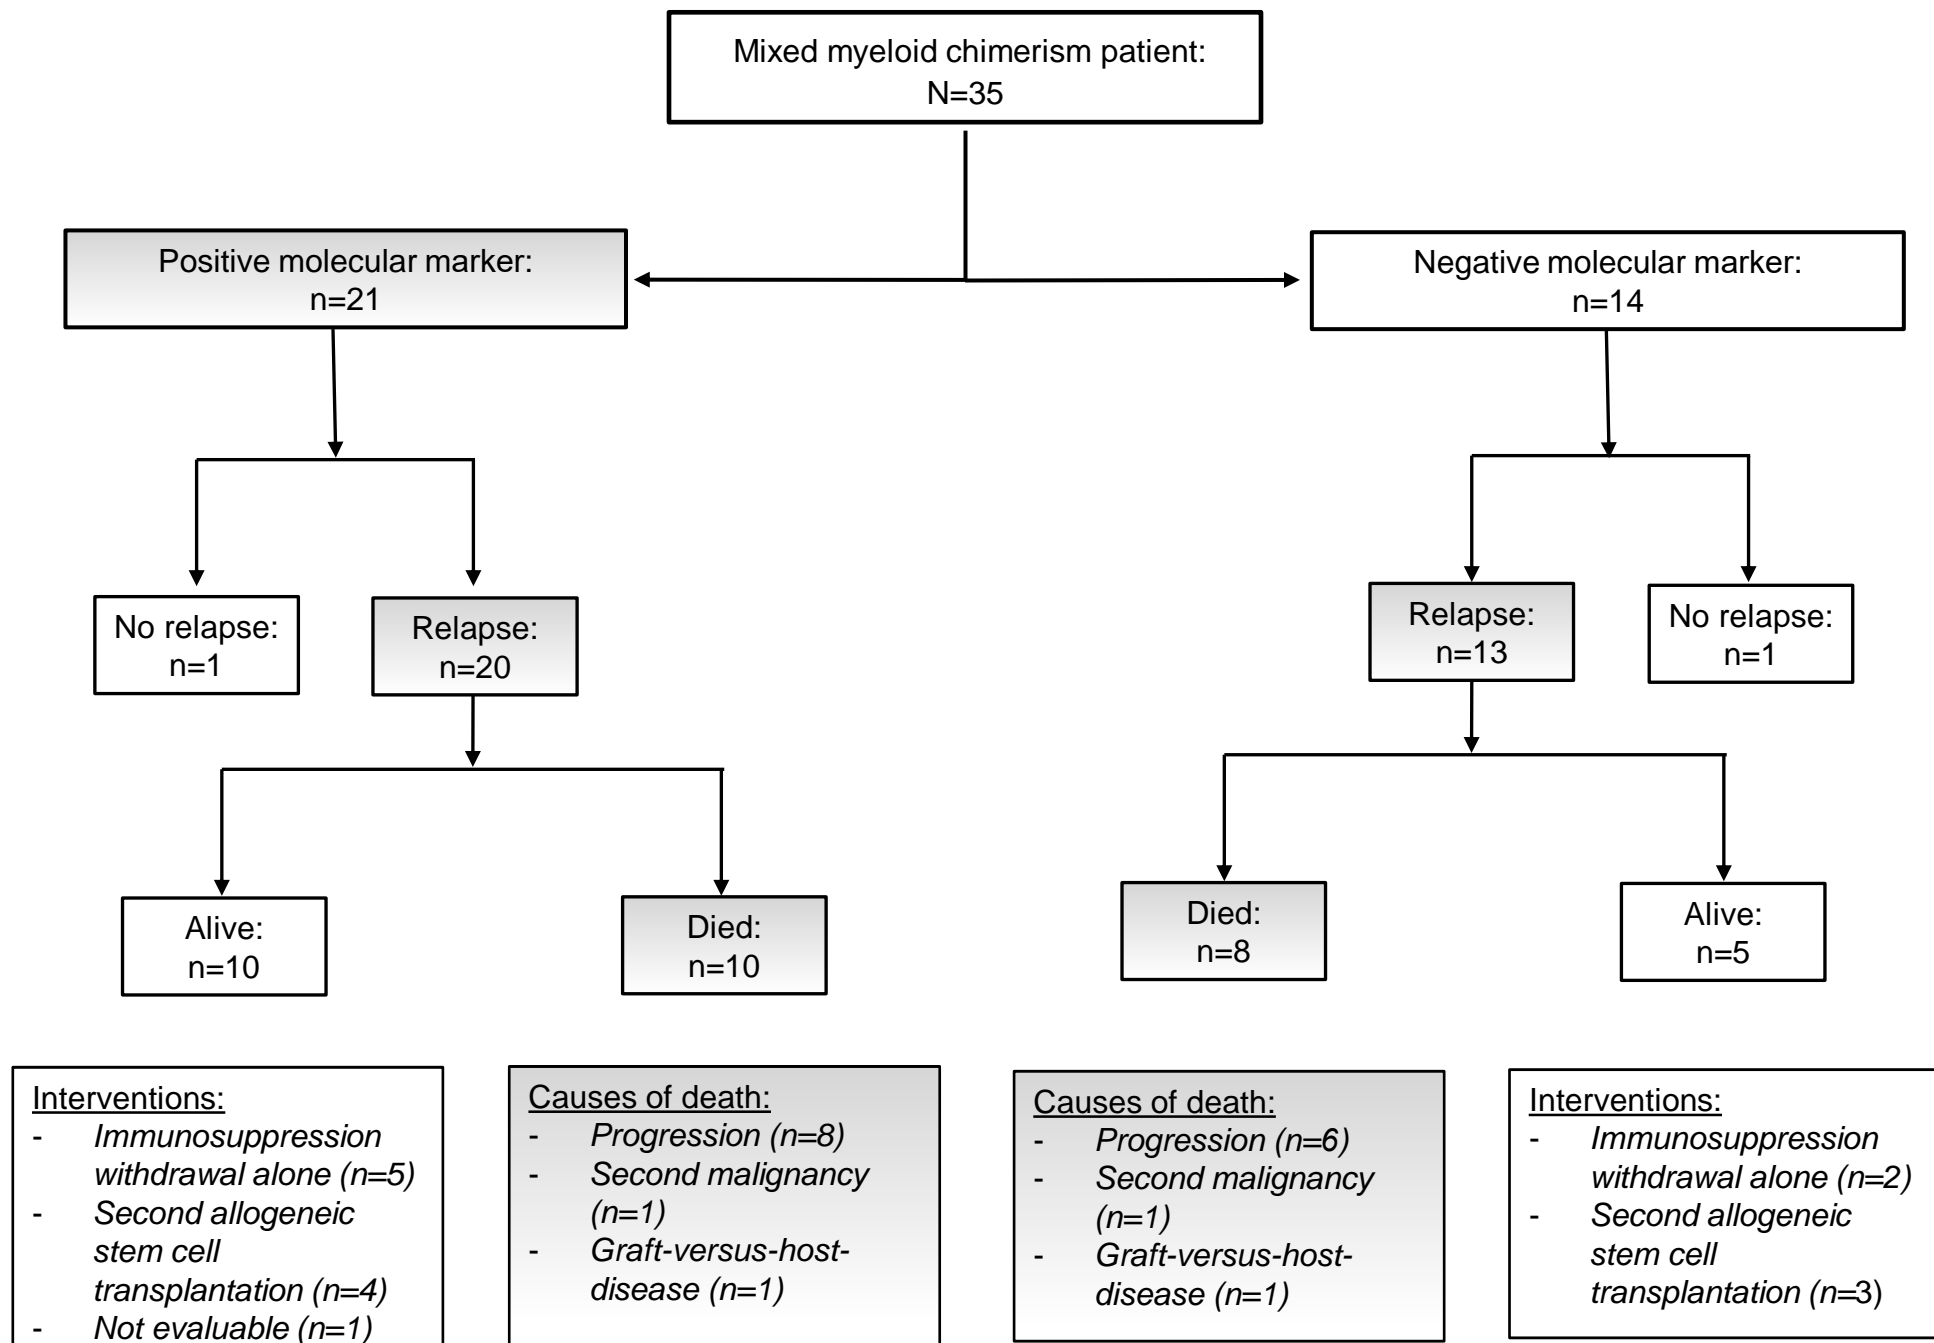

Supplementary figure 2

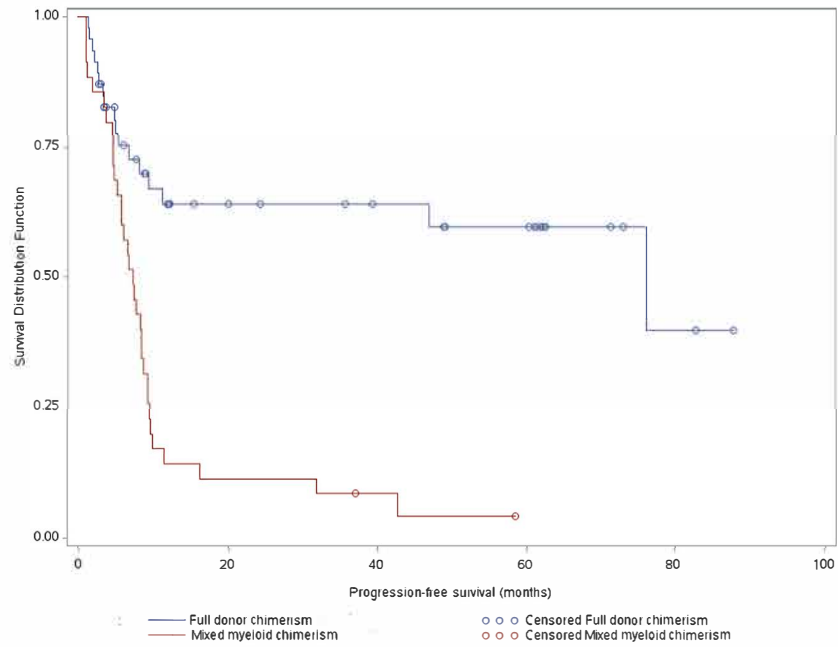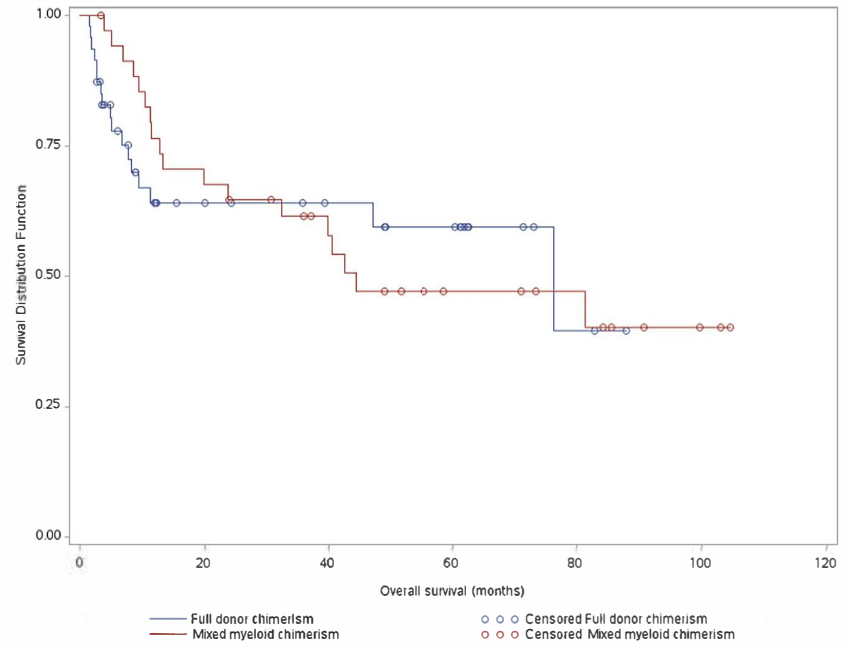

Supplementary Figure 3
